# Supplementary material for: Recurrence factors in patients with Keratinizing squamous metaplasia of the bladder after surgical management: a single-center retrospective study
Source: PubMed Central journal article supplement — Transl Androl Urol. 2021 Feb;10(2):734–40. doi: 10.21037/tau-20-948 (PMC7947458; doi:10.21037/tau-20-948), 2021-02
Supplement: tau-10-02-734-dss.pdf [file tau-10-02-734-dss.pdf]

## Data Sharing Statement

|                     |                                                                                                                                                     |                                                          |
|---------------------|-----------------------------------------------------------------------------------------------------------------------------------------------------|----------------------------------------------------------|
| <b>Article Info</b> | <a href="http://dx.doi.org/10.21037/tau-20-948">http://dx.doi.org/10.21037/tau-20-948</a>                                                           |                                                          |
| <b>Item</b>         | <b>Question</b>                                                                                                                                     | <b>Authors' Response<br/>(place - if not applicable)</b> |
| 1                   | Would you like to share data collected for your study to others?                                                                                    | No, thanks.                                              |
| 2                   | If not, would you like to share the reason for your decision?                                                                                       | No additional unpublished data are available.            |
| 3                   | What data in particular will be shared?                                                                                                             | -                                                        |
| 4                   | Any other documents will be shared? Such as study protocol, statistical analysis plan, informed consent form, clinical study report, analytic code. | No                                                       |
| 5                   | When will data availability begin?                                                                                                                  | -                                                        |
| 6                   | When will data availability end?                                                                                                                    | -                                                        |
| 7                   | To whom will you share the data?                                                                                                                    | -                                                        |
| 8                   | For what type of analysis or purpose?                                                                                                               | -                                                        |
| 9                   | How or where can the data/documents be obtained?                                                                                                    | -                                                        |
| 10                  | Any other restrictions?                                                                                                                             | -                                                        |
